# Supplementary material
Source: Springer Nature journal article supplement (https://www.springermedizin.de/resource/supplementary/13045_2013_327_MOESM8_ESM.pdf/9661132)
Supplement: MOESM8 [file 9661132]

**Table 2 Selected Compounds for AML Treatment Proposed in the International Database for Patents of Inventions.**

| Compound                                                                            | Proposed Function | Cited in      |
|-------------------------------------------------------------------------------------|-------------------|---------------|
| 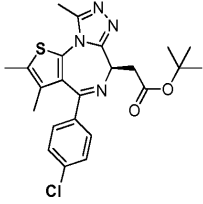   | BDR4 inhibitor    | WO2011143660  |
|    | HDAC inhibitor    | WO2010009285  |
|   | DNMT inhibitor    | US20080138329 |
|  | antiproliferative | US2010305059  |
|  | HDAC inhibitor    | US2006106049  |
|  | HDAC inhibitor    | ES2399670     |
